# Supplementary material for: Proteomic analysis of stachyose contribution to the growth of Lactobacillus acidophilus CICC22162
Source: Royal Society of Chemistry journal article supplement (doi:10.1039/c8fo00528a), 2018-01-01

## Supplementary file

**Table S1.** Primers used in RT-PCR analysis of proteins identified by 2-DE

| Gene     | Forward                      | Reverse                    | Product size (bp) |
|----------|------------------------------|----------------------------|-------------------|
| 16S rRNA | CCTACGGGAGGCAGCAG            | ATTACCGCGGCTGCTGG          | 103               |
| pthA     | GAGGCGATACTCTTACTGTTGATG     | TGGTGCTTTTGGTACTGGACG      | 128               |
| ecfA1    | TGTTGGTGCTACTGTAGGTGA        | ACCCGTTGCTTCTGTCCTC        | 116               |
| LBA0908  | TGAAACCCTAAAAGGTGGCG         | CTCTTTTTTTGCTCATCCCTCC     | 149               |
| LBA0745  | CAGGTAAGACTGAAAGCTGGTAT<br>G | AATTGTGCCTGCTGGAACATA<br>G | 182               |

pthA: phosphotransferase system enzyme II; ecfA1: ABC ECF transporter, ATP-binding protein; LBA0908: fumarate reductase flavoprotein; LBA0745: mannose-6-phosphate isomerase

**Table S2.** The growth characteristics of *L.acidophilus* CICC22162 in staMRS or gluMRS

| Medium | Fitted curves of growth curves | R <sup>2</sup> | The maximum specific growth rate |
|--------|--------------------------------|----------------|----------------------------------|
| staMRS | $y = -0.0015x^2 + 0.1399x$     | 0.9625         | 0.529                            |
| gluMRS | $y = -0.0015x^2 + 0.1483x$     | 0.9618         | 0.538                            |

**Table S3.** Energy Components Contributing to Binding Free Energies in stachyose-LaEcfS

| Contribution                  | 21 <sup>st</sup> (Mode I) | 24 <sup>th</sup> (Mode II) | 26 <sup>th</sup> (Mode III) | 28 <sup>th</sup> (Mode IV) |
|-------------------------------|---------------------------|----------------------------|-----------------------------|----------------------------|
| $\Delta E_{\text{ele}}$       | -73.14                    | -7.69                      | -34.46                      | -25.26                     |
| $\Delta E_{\text{vdw}}$       | -66.48                    | -28.58                     | -59.87                      | -47.9                      |
| $\Delta E_{\text{gas}}$       | -139.63                   | -36.27                     | -94.33                      | -73.16                     |
| $\Delta G_{\text{GB}}$        | 100.68                    | 28.57                      | 65.85                       | 52.09                      |
| $\Delta G_{\text{sol-np,GB}}$ | -9.41                     | -4.87                      | -8.2                        | -7.17                      |
| $\Delta G_{\text{sol,GB}}$    | 91.27                     | 23.7                       | 57.64                       | 44.91                      |
| $\Delta G_{\text{ele,GB}}$    | 27.54                     | 20.88                      | 31.38                       | 26.83                      |
| $\Delta G_{\text{bind,GB}}$   | -48.35                    | -12.57                     | -36.69                      | -28.25                     |

All energies are in kcal mol<sup>-1</sup>.

**Table S4.** Energy Components Contributing to Binding Free Energies in various ECF transporters

| Ligand                        | Stachyose    | Vitamin B9 | Vitamin B2 | biotin  | Vitamin B1 |
|-------------------------------|--------------|------------|------------|---------|------------|
| Receptor                      | LaEcf_mode21 | LdEcf      | TmRibU     | LiBioY  | LiThiT     |
| $\Delta E_{\text{ele}}$       | -73.14       | -75.67     | -89.14     | -202.59 | -43.84     |
| $\Delta E_{\text{vdW}}$       | -66.48       | -61.39     | -49.68     | -38.31  | -35.72     |
| $\Delta E_{\text{gas}}$       | -139.63      | -137.06    | -138.83    | -240.9  | -79.56     |
| $\Delta G_{\text{GB}}$        | 100.68       | 96.85      | 91.87      | 202.24  | 69.23      |
| $\Delta G_{\text{sol-np,GB}}$ | -9.41        | -6.92      | -5.99      | -4.51   | -4.96      |
| $\Delta G_{\text{sol,GB}}$    | 91.27        | 89.92      | 85.88      | 197.73  | 64.27      |
| $\Delta G_{\text{ele,GB}}$    | 27.54        | 21.18      | 2.73       | -0.34   | 25.38      |
| $\Delta G_{\text{bind,GB}}$   | -48.35       | -47.14     | -52.95     | -43.17  | -15.29     |

All energies are in kcal mol<sup>-1</sup>.

Figure S1. Two-dimensional gel electrophoresis profile of proteins from *L. acidophilus* CICC 22162 in staMRS (A) or gluMRS (B).

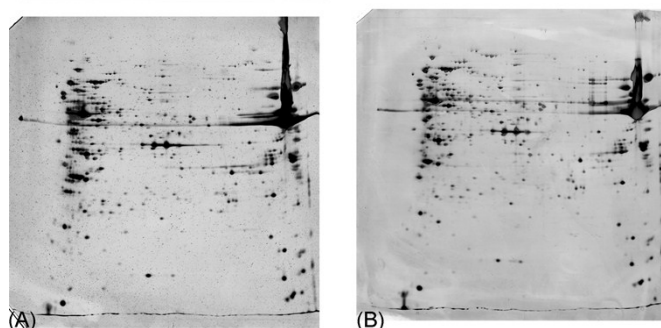

Figure S2. Peptide mass fingerprint spectrum of proteins identified from reference 2D-gel (pH 3–10) of *L. acidophilus* grown on staMRS or gluMRS medium. Protein identifications were confirmed with a Mascot score of 80 for peptide mass fingerprint.

#### Spot 4 ATP-dependent helicase

| <a href="#">gi 227902899</a>                                | Mass: 89267 | Score: 151 | Expect: 6.8e-009 | Queries matched: 15 |     |      |      |                       |
|-------------------------------------------------------------|-------------|------------|------------------|---------------------|-----|------|------|-----------------------|
| possible DNA helicase [Lactobacillus acidophilus ATCC 4796] |             |            |                  |                     |     |      |      |                       |
| Observed                                                    | Mr(expt)    | Mr(calc)   | ppm              | Start               | End | Miss | Ions | Peptide               |
| 997.5504                                                    | 996.5431    | 996.5392   | 3.89             | 469                 | 476 | 0    | ---  | R.AQYLSFLR.A          |
| 1088.5977                                                   | 1087.5904   | 1087.5986  | -7.48            | 686                 | 695 | 0    | ---  | K.TTLIATANQR.L        |
| 1088.5977                                                   | 1087.5904   | 1087.5986  | -7.48            | 686                 | 695 | 0    | ---  | K.TTLIATANQR.L        |
| 1093.5161                                                   | 1092.5088   | 1092.5087  | 0.07             | 107                 | 115 | 0    | ---  | R.IDFQEQGEK.K         |
| 1207.6125                                                   | 1206.6052   | 1206.5993  | 4.93             | 619                 | 628 | 1    | ---  | R.QGEKIESFNR.K        |
| 1363.7513                                                   | 1362.7440   | 1362.7507  | -4.90            | 608                 | 618 | 1    | ---  | K.ELIDFTKQILR.Q       |
| 1388.7186                                                   | 1387.7113   | 1387.7307  | -13.96           | 210                 | 221 | 0    | ---  | K.SIVTTIQEQNK.I       |
| 1502.8595                                                   | 1501.8522   | 1501.8756  | -15.54           | 696                 | 709 | 0    | 26   | R.LVDGTLIIPSYLAK.G    |
| 1502.8595                                                   | 1501.8522   | 1501.8756  | -15.54           | 696                 | 709 | 0    | ---  | R.LVDGTLIIPSYLAK.G    |
| 1546.7792                                                   | 1545.7719   | 1545.7926  | -13.40           | 755                 | 768 | 0    | 18   | K.SPLLDVDPATYVEK.-    |
| 1546.7792                                                   | 1545.7719   | 1545.7926  | -13.40           | 755                 | 768 | 0    | ---  | K.SPLLDVDPATYVEK.-    |
| 1600.8369                                                   | 1599.8296   | 1599.8409  | -7.07            | 327                 | 339 | 1    | ---  | K.FKDSVNFNLLIR.Y      |
| 1635.8087                                                   | 1634.8014   | 1634.8264  | -15.28           | 225                 | 241 | 0    | ---  | R.NTSADLLFVQGAAGSGK.T |
| 1771.0007                                                   | 1769.9934   | 1769.9999  | -3.67            | 210                 | 224 | 1    | ---  | K.SIVTTIQEQNKIIR.N    |

#### Spot 5: tRNA uridine 5-carboxymethylaminomethyl modification enzyme GidA

[gi|58338214](#) Mass: 70434 Score: 139 Expect: 1.1e-007 Queries matched: 15  
tRNA uridine 5-carboxymethylaminomethyl modification enzyme GidA [Lactobacillus acidophilus NCFM]

| Observed  | Mr(expt)  | Mr(calc)  | ppm    | Start | End   | Miss | Ions | Peptide                                   |
|-----------|-----------|-----------|--------|-------|-------|------|------|-------------------------------------------|
| 1283.7201 | 1282.7128 | 1282.6993 | 10.5   | 596   | - 606 | 0    | ---  | K.IRPETLAQAER.I                           |
| 1283.7201 | 1282.7128 | 1282.6993 | 10.5   | 596   | - 606 | 0    | ---  | K.IRPETLAQAER.I                           |
| 1335.7618 | 1334.7545 | 1334.7419 | 9.49   | 441   | - 451 | 1    | 12   | R.LILRHDNADLR.L                           |
| 1335.7618 | 1334.7545 | 1334.7419 | 9.49   | 441   | - 451 | 1    | ---  | R.LILRHDNADLR.L                           |
| 1349.7258 | 1348.7185 | 1348.7211 | -1.93  | 519   | - 529 | 0    | 19   | R.RPHVTINDIER.L                           |
| 1349.7258 | 1348.7185 | 1348.7211 | -1.93  | 519   | - 529 | 0    | ---  | R.RPHVTINDIER.L                           |
| 1365.6895 | 1364.6822 | 1364.6758 | 4.69   | 280   | - 290 | 1    | ---  | R.YCPSIEDKVVR.F + Carbamidomethyl (C)     |
| 1648.8511 | 1647.8438 | 1647.8719 | -17.07 | 410   | - 424 | 0    | ---  | R.NDAYIGVLIDDLVTK.G                       |
| 1673.8378 | 1672.8305 | 1672.8342 | -2.20  | 125   | - 139 | 0    | ---  | R.QAIVDELVVEDGVCK.G + Carbamidomethyl (C) |
| 1783.8939 | 1782.8866 | 1782.8788 | 4.39   | 459   | - 473 | 1    | ---  | K.LGLISDDRYQAFEEK.K                       |
| 2023.0614 | 2022.0541 | 2022.0422 | 5.89   | 484   | - 500 | 0    | ---  | R.LHEITVHVITDEVQDFLK.S                    |
| 2023.0614 | 2022.0541 | 2022.0422 | 5.89   | 484   | - 500 | 0    | ---  | R.LHEITVHVITDEVQDFLK.S                    |
| 2100.1694 | 2099.1621 | 2099.1375 | 11.7   | 607   | - 626 | 0    | 21   | R.ISGVNFPADLAILSVYIQNGR.Y                 |
| 2100.1694 | 2099.1621 | 2099.1375 | 11.7   | 607   | - 626 | 0    | ---  | R.ISGVNFPADLAILSVYIQNGR.Y                 |
| 2136.0720 | 2135.0647 | 2135.0568 | 3.70   | 572   | - 590 | 1    | ---  | K.KIPADIDYNMIEGLATEAR.Q + Oxidation (M)   |

#### Spot 6: exodeoxyribonuclease

[gi|58337957](#) Mass: 29506 Score: 144 Expect: 3.4e-008 Queries matched: 10  
exodeoxyribonuclease [Lactobacillus acidophilus NCFM]

| Observed  | Mr(expt)  | Mr(calc)  | ppm    | Start | End   | Miss | Ions | Peptide                |
|-----------|-----------|-----------|--------|-------|-------|------|------|------------------------|
| 1127.5697 | 1126.5624 | 1126.5771 | -13.03 | 61    | - 70  | 1    | ---  | K.RYDGAAVFTK.I         |
| 1127.5697 | 1126.5624 | 1126.5771 | -13.03 | 61    | - 70  | 1    | ---  | K.RYDGAAVFTK.I         |
| 1788.8251 | 1787.8178 | 1787.8366 | -10.52 | 173   | - 187 | 0    | 37   | K.EFTELLNAGFEDTFR.T    |
| 1788.8251 | 1787.8178 | 1787.8366 | -10.52 | 173   | - 187 | 0    | ---  | K.EFTELLNAGFEDTFR.T    |
| 1916.9369 | 1915.9296 | 1915.9316 | -1.02  | 172   | - 187 | 1    | 17   | R.KEFTELLNAGFEDTFR.T   |
| 1916.9369 | 1915.9296 | 1915.9316 | -1.02  | 172   | - 187 | 1    | ---  | R.KEFTELLNAGFEDTFR.T   |
| 2066.9841 | 2065.9768 | 2065.9898 | -6.26  | 99    | - 115 | 0    | 26   | K.FYYVNTFAPYAGEQLQR.L  |
| 2066.9841 | 2065.9768 | 2065.9898 | -6.26  | 99    | - 115 | 0    | ---  | K.FYYVNTFAPYAGEQLQR.L  |
| 2284.1772 | 2283.1699 | 2283.0484 | 53.2   | 45    | - 61  | 1    | ---  | K.IDLTEYYQYWNFSEEK.R.Y |
| 2284.1772 | 2283.1699 | 2283.0484 | 53.2   | 45    | - 61  | 1    | ---  | K.IDLTEYYQYWNFSEEK.R.Y |

#### Spot 7 hypothetical protein Sgly\_3199

[gi|325291285](#) Mass: 43621 Score: 86 Expect: 0.02 Queries matched: 6  
hypothetical protein Sgly\_3199 [Syntrophobotulus glycolicus DSM 8271]

| Observed  | Mr(expt)  | Mr(calc)  | ppm    | Start | End   | Miss | Ions | Peptide                       |
|-----------|-----------|-----------|--------|-------|-------|------|------|-------------------------------|
| 996.5878  | 995.5805  | 995.6128  | -32.38 | 174   | - 184 | 1    | ---  | K.LPGIGVKAGGK.A               |
| 996.5878  | 995.5805  | 995.6128  | -32.38 | 370   | - 380 | 1    | ---  | K.LPGIGVKAGGK.A               |
| 2328.3359 | 2327.3286 | 2327.2849 | 18.8   | 152   | - 173 | 1    | ---  | K.LTLTPNNAGDTFKIQVVSKEPK.L    |
| 2328.3359 | 2327.3286 | 2327.2849 | 18.8   | 348   | - 369 | 1    | ---  | K.LTLTPNNAGDTFKIQVVSKEPK.L    |
| 2406.2224 | 2405.2151 | 2405.3166 | -42.17 | 122   | - 146 | 0    | ---  | K.ELTIAASNIAAPVLSATPVQAPGSK.A |
| 2406.2224 | 2405.2151 | 2405.3166 | -42.17 | 318   | - 342 | 0    | ---  | K.ELTIAASNIAAPVLSATPVQAPGSK.A |

#### Spot 8 lysin

[gi|58337625](#) Mass: 15900 Score: 106 Expect: 0.00021 Queries matched: 5  
lysin [Lactobacillus acidophilus NCFM]

| Observed  | Mr(expt)  | Mr(calc)  | ppm  | Start | End   | Miss | Ions | Peptide                          |
|-----------|-----------|-----------|------|-------|-------|------|------|----------------------------------|
| 902.5370  | 901.5297  | 901.5021  | 30.6 | 123   | - 131 | 0    | 11   | K.AAQAFGLPK.G                    |
| 902.5370  | 901.5297  | 901.5021  | 30.6 | 123   | - 131 | 0    | ---  | K.AAQAFGLPK.G                    |
| 1237.6805 | 1236.6732 | 1236.6098 | 51.2 | 73    | - 83  | 1    | ---  | K.VSEGTSYRNPK.A                  |
| 2820.6060 | 2819.5987 | 2819.4090 | 67.3 | 45    | - 72  | 0    | 52   | R.ALGVDVASYQSADLSSHAQAGSQFAIVK.V |
| 2820.6060 | 2819.5987 | 2819.4090 | 67.3 | 45    | - 72  | 0    | ---  | R.ALGVDVASYQSADLSSHAQAGSQFAIVK.V |

#### Spot 9 phosphotransferase system enzyme II (PTS)

[gi|58336978](#) Mass: 13904 Score: 123 Expect: 4.3e-006 Queries matched: 6  
phosphotransferase system enzyme II [Lactobacillus acidophilus NCFM]

| Observed  | Mr(expt)  | Mr(calc)  | ppm  | Start | End | Miss | Ions | Peptide                                 |
|-----------|-----------|-----------|------|-------|-----|------|------|-----------------------------------------|
| 1473.7764 | 1472.7691 | 1472.7188 | 34.2 | 42    | -   | 54   | 0    | 38 K.FSAETPVSDVFVK.R                    |
| 1473.7764 | 1472.7691 | 1472.7188 | 34.2 | 42    | -   | 54   | 0    | --- K.FSAETPVSDVFVK.R                   |
| 1629.9064 | 1628.8991 | 1628.8199 | 48.7 | 42    | -   | 55   | 1    | 17 K.FSAETPVSDVFVKR.G                   |
| 1629.9064 | 1628.8991 | 1628.8199 | 48.7 | 42    | -   | 55   | 1    | --- K.FSAETPVSDVFVKR.G                  |
| 3488.9607 | 3487.9534 | 3487.7188 | 67.3 | 96    | -   | 126  | 1    | 13 K.APLANAVYFDPDVSQPLPTFKVDDDIVYEHI.-  |
| 3488.9607 | 3487.9534 | 3487.7188 | 67.3 | 96    | -   | 126  | 1    | --- K.APLANAVYFDPDVSQPLPTFKVDDDIVYEHI.- |

### Spot 13 fumarate reductase flavoprotein

[gi|58337211](#) Mass: 49931 Score: 221 Expect: 6.8e-016 Queries matched: 15  
fumarate reductase flavoprotein [Lactobacillus acidophilus NCFM]

| Observed  | Mr(expt)  | Mr(calc)  | ppm  | Start | End | Miss | Ions | Peptide                                                 |
|-----------|-----------|-----------|------|-------|-----|------|------|---------------------------------------------------------|
| 965.5194  | 964.5121  | 964.4978  | 14.9 | 280   | -   | 287  | 0    | --- R.FVNELSTR.K                                        |
| 994.5233  | 993.5160  | 993.5131  | 2.92 | 152   | -   | 161  | 0    | --- K.SGVDIFTGAK.V                                      |
| 1168.6333 | 1167.6260 | 1167.5924 | 28.8 | 209   | -   | 217  | 0    | 9 K.YRPDLVDYK.T                                         |
| 1168.6333 | 1167.6260 | 1167.5924 | 28.8 | 209   | -   | 217  | 0    | --- K.YRPDLVDYK.T                                       |
| 1407.7385 | 1406.7312 | 1406.6902 | 29.1 | 276   | -   | 287  | 1    | --- K.NGDRFVNELSTR.K                                    |
| 1407.7385 | 1406.7312 | 1406.6902 | 29.1 | 276   | -   | 287  | 1    | --- K.NGDRFVNELSTR.K                                    |
| 1433.8132 | 1432.8059 | 1432.7674 | 26.9 | 431   | -   | 444  | 0    | 73 R.IGNSIAETVIFGR.Q                                    |
| 1433.8132 | 1432.8059 | 1432.7674 | 26.9 | 431   | -   | 444  | 0    | --- R.IGNSIAETVIFGR.Q                                   |
| 1578.8228 | 1577.8155 | 1577.7685 | 29.8 | 339   | -   | 352  | 0    | --- K.IGVDGYNLNETVER.W                                  |
| 1671.8616 | 1670.8543 | 1670.8125 | 25.1 | 414   | -   | 430  | 0    | 26 K.GLYAAGEVSGGLHGNNR.I                                |
| 1671.8616 | 1670.8543 | 1670.8125 | 25.1 | 414   | -   | 430  | 0    | --- K.GLYAAGEVSGGLHGNNR.I                               |
| 2505.3445 | 2504.3372 | 2504.2547 | 32.9 | 289   | -   | 311  | 0    | --- K.IVSDAITNLHEDGAYLIFDSGVR.A                         |
| 2633.4395 | 2632.4322 | 2632.3497 | 31.4 | 288   | -   | 311  | 1    | --- R.KIVSDAITNLHEDGAYLIFDSGVR.A                        |
| 2887.5254 | 2886.5181 | 2886.4188 | 34.4 | 312   | -   | 337  | 0    | --- R.AHFGAVEFYDQIGLVQHGDTLEELAK.K                      |
| 3418.6956 | 3417.6883 | 3417.5518 | 40.0 | 52    | -   | 82   | 0    | --- R.ASSGMNASESLVQLDEGIIDNNQDFYNETLK.G + Oxidation (M) |

### Spot 15 mannose-6-phosphate isomerase

[gi|58337059](#) Mass: 36620 Score: 168 Expect: 1.4e-010 Queries matched: 10  
mannose-6-phosphate isomerase [Lactobacillus acidophilus NCFM]

| Observed  | Mr(expt)  | Mr(calc)  | ppm  | Start | End | Miss | Ions | Peptide                                        |
|-----------|-----------|-----------|------|-------|-----|------|------|------------------------------------------------|
| 1044.6533 | 1043.6460 | 1043.6379 | 7.79 | 75    | -   | 83   | 1    | --- K.AKEFPLLVK.F                              |
| 1044.6533 | 1043.6460 | 1043.6379 | 7.79 | 75    | -   | 83   | 1    | --- K.AKEFPLLVK.F                              |
| 1314.6616 | 1313.6543 | 1313.6252 | 22.2 | 191   | -   | 200  | 1    | 8 R.LYDYDRVDQK.T                               |
| 1314.6616 | 1313.6543 | 1313.6252 | 22.2 | 191   | -   | 200  | 1    | --- R.LYDYDRVDQK.T                             |
| 1855.9470 | 1854.9397 | 1854.8782 | 33.2 | 175   | -   | 190  | 0    | 10 K.GCLVIETQSSSDVTYR.L + Carbamidomethyl (C)  |
| 1855.9470 | 1854.9397 | 1854.8782 | 33.2 | 175   | -   | 190  | 0    | --- K.GCLVIETQSSSDVTYR.L + Carbamidomethyl (C) |
| 2028.1167 | 2027.1094 | 2027.0476 | 30.5 | 58    | -   | 74   | 1    | 8 K.SLREVYLEHPELFGNPK.A                        |
| 2028.1167 | 2027.1094 | 2027.0476 | 30.5 | 58    | -   | 74   | 1    | --- K.SLREVYLEHPELFGNPK.A                      |
| 2304.1350 | 2303.1277 | 2303.0455 | 35.7 | 84    | -   | 103  | 0    | 79 K.FLDANDNLSVQVHPDDDYAR.K                    |
| 2304.1350 | 2303.1277 | 2303.0455 | 35.7 | 84    | -   | 103  | 0    | --- K.FLDANDNLSVQVHPDDDYAR.K                   |

The MS/MS fragmentation of mannose-6-phosphate isomerase. Single peptide based protein

identifications by MS/MS analysis were confirmed with a Mascot score of 79.



---

MS/MS Fragmentation of **FLDANDNLSVQVHPDDDYAR**  
Found in **gi|58337059**, mannose-6-phosphate isomerase [Lactobacillus acidophilus NCFM]

Match to Query 13: 2303.127724 from(2304.135000,1+)  
Title: MaldiWellID: 54686, SpectrumID: 158684,

Click mouse within plot area to zoom in by factor of two about that point

Or, Plot from  to  Da

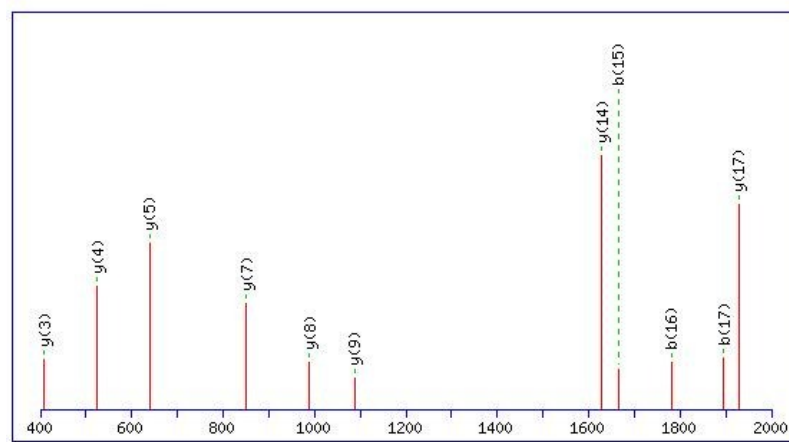

Monoisotopic mass of neutral peptide Mr(calc): 2303.0455  
Ions Score: 79 Expect: 0.00011  
Matches (**Bold Red**): 11/359 fragment ions using 11 most intense peaks

Figure S3. Structure features of ECF and MSM transporters

(A) The ECF transporter in cartoon representation (LaEcfS in yellow, LaEcfT in magenta, LaEcfA1 in red and LaEcfA2 in silver), and the MSM transporter in cartoon representation (LaMsmG in yellow, LaMsmF in magenta, the LaMsmK dimer in green and orange) (B) System setup for MD simulations. The ECF transporter was inserted in the POPC membrane and solvated in the water solvent. (C) The number of basic residues of LaEcfS and LaEcfT binding to the lipids along simulations.

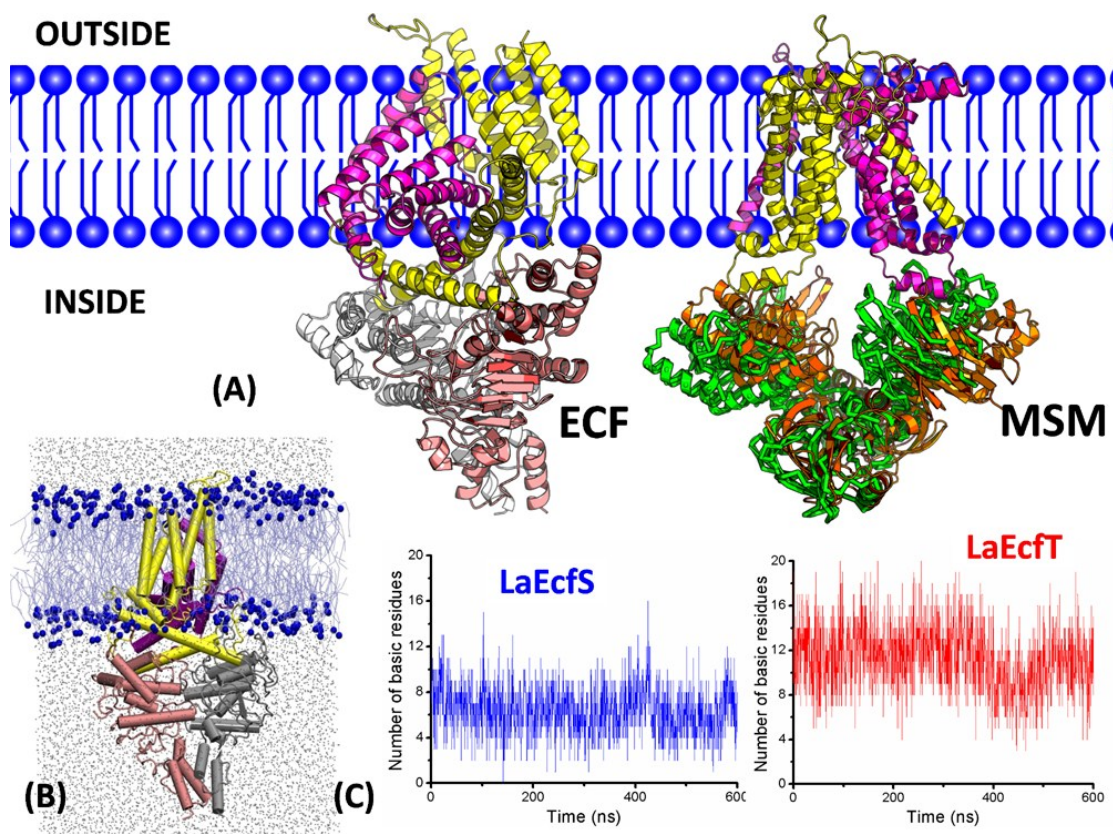

Figure S4. The number of lipids binding to LaEcfS/T along simulations

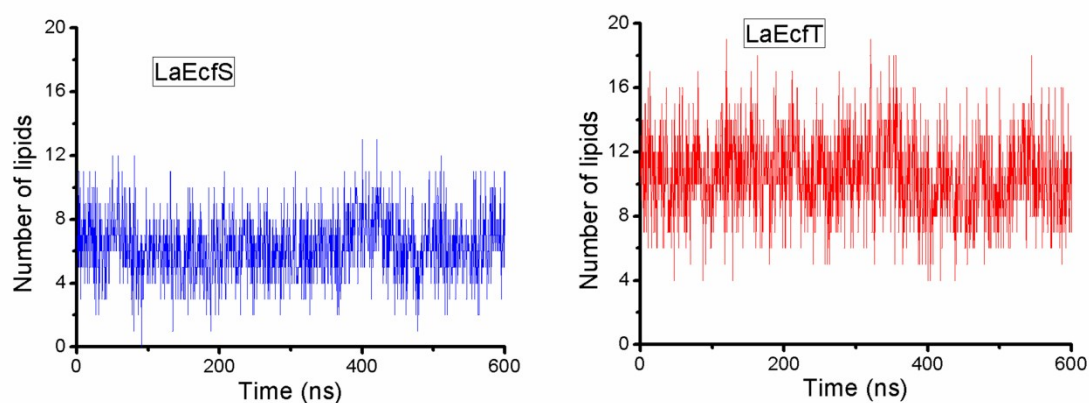

Figure S5. Binding modes of docked stachyose by SwissDock

(A) Superposition of 250 docking hints, colored by their scores. (B) Representations of the four binding modes that were identified. These modes correspond to different spatial orientations of stachyose in complex with LaEcfS (magenta).



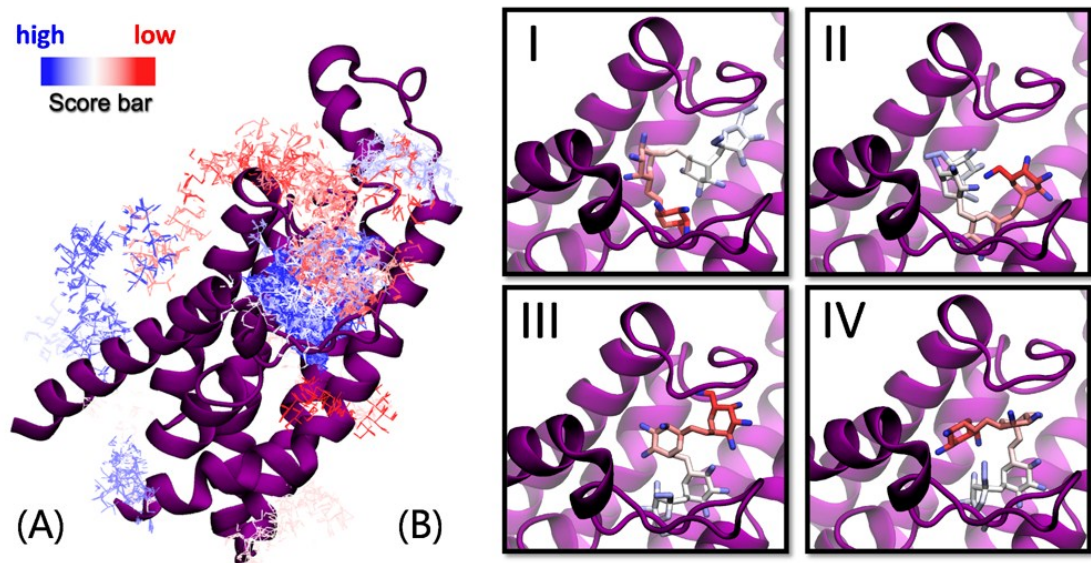

Figure S6. A close view of interactions in the stachyose-LaEcfS and vitaminB9-LdEcfS complexes. Residues on EcfS responsible for its binding to stachyose (A) and vitamin B9 (B). The per-residue interaction spectrum of the residues of EcfS with stachyose (C) and vitamin B9 (D) according to MM-GBSA free energy decomposition analysis.

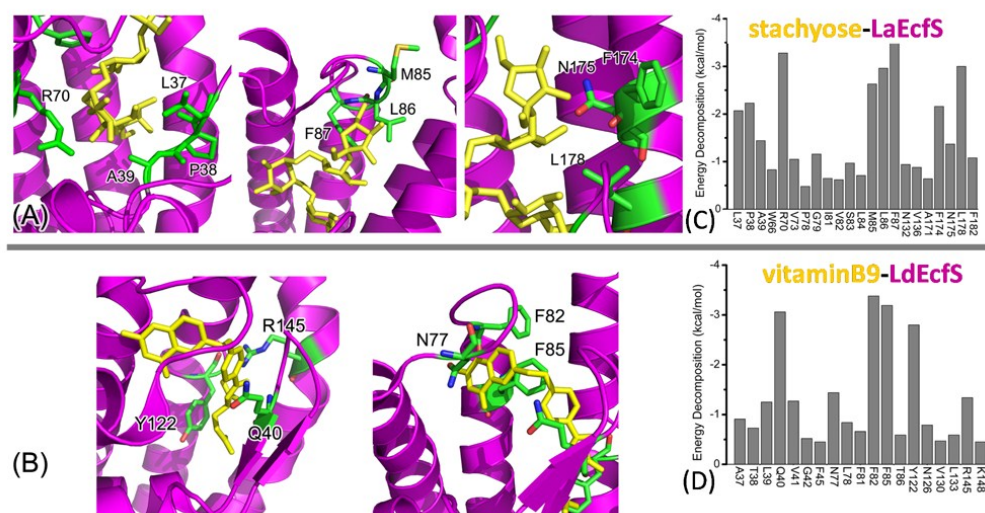

Figure S7. Representations of the substrate-load ECF extracted from the X-ray structures. The pocket volumes from these EcfS structures were calculated by CastP.

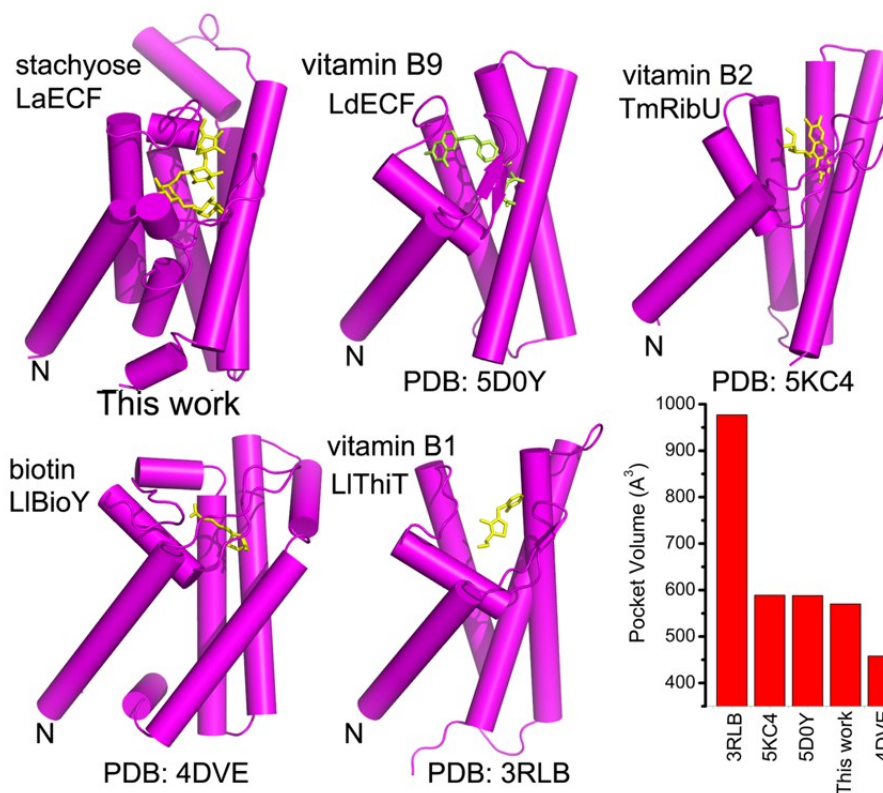

Supplement: c8fo00528a1.pdf [file c8fo00528a1.pdf]
